# Supplementary material for: Ultrathin MOF nanosheets and their mixed-matrix membranes for ammonia and aliphatic amine sensing in water
Source: Royal Society of Chemistry journal article supplement (doi:10.1039/d4nr00546e), 2024-01-01
Supplement: d4nr00546e1.pdf [file d4nr00546e1.pdf]

## Supporting Information

# Ultrathin MOF nanosheets and its Mixed-Matrix Membranes for ammonia and aliphatic amine sensing in water

*Ritu Ladhi*<sup>[a]</sup>, *Arshinder Kaur Dhillon*,<sup>[a]</sup>, *Monika Singh*<sup>\*[a]</sup>

<sup>a]</sup> Institute of Nano Science and Technology, Knowledge City, Sector-81, Mohali-140306, Punjab, INDIA

\*Corresponding author: [monika@inst.ac.in](mailto:monika@inst.ac.in)

## Contents

| <b>Section</b> | <b>Description</b>                                                                                                                                                                                                        | <b>Page No.</b> |
|----------------|---------------------------------------------------------------------------------------------------------------------------------------------------------------------------------------------------------------------------|-----------------|
| Section S1     | General information                                                                                                                                                                                                       | S-3 to S-4      |
| Section S2     | Characterization of Ni- <i>btc</i> NS: AFM, PXRD profiles, FESEM, BET isotherm, TGA profiles, XPS spectra, EDS mapping and emission and excitation spectra related to sensing of amines by Ni- <i>btc</i> (Figures S1-S9) | S-5 to S-13     |
| Section S3     | Fluorescence intensity and detection limit calculation spectra related to sensing of amines by Ni- <i>btc</i> (Figures S10-S13), Lifetime measurements table (Figures S14, Table S1), Recyclability graph (Figure S15)    | S-14 to S-20    |
| Section S4     | HOMO LUMO energy calculations and graphs (Figure S 16, S17, S18 Table S2), literature comparison (Table S3 and S4)                                                                                                        | S-21 to S-26    |
| Section S4     | Mixed Matrix membrane studies: EDS mapping, MMM Recyclability test, PXRD, FESEM and experimental setup, Model waste water testing (Figure S19- S25, Table S5)                                                             | S-27 to S-33    |
| References     |                                                                                                                                                                                                                           | S-34            |

## Section S1: General information

**Physical Measurements** FT-IR spectra were recorded on a PerkinElmer Spectrum I spectrometer with samples prepared as KBr pellets in the range of 4000-400  $\text{cm}^{-1}$ . The solid state (DRS) and solution state UV-Vis spectra of compound and analyte were explored by UV/Vis spectrophotometer (Shimadzu UV-2600). The morphological studies were carried out by field emission scanning electron microscopy (FESEM) on a JEOL JSM-7600F system. TGA analysis was carried out using Perkin-Elmer Pyris 1 model on well ground samples in flowing nitrogen atmosphere at a heating rate of 10  $^{\circ}\text{C}/\text{min}$ . Emission spectra were recorded using an EDINBURGH instrument FS5 spectrophotometer. Time-resolved lifetime decay profiles were measured using photoluminescence Fluorolog 3-221 (Horiba Scientific) single photon counting controller. Powder X-ray diffraction analysis was carried out on a Bruker D8-Advance Eco Diffractometer using Ni-filtered  $\text{Cu K}\alpha$  radiation at room temperature. The data were collected over the range of  $5^{\circ} < 2\theta < 60^{\circ}$  with a step size of  $0.01^{\circ}$ . The BET nitrogen isotherm analysis was carried out on Quantachrome ASiQwin at 300 K.

**Theoretical calculations** Geometry optimization and frequency calculations are performed using Becke's three parameter functional in combination with the Lee-Yang-Parr correlation functional (B3LYP) and 6-31G basis set. Gaussian 09 suite of programs is used for all the calculations.

## Experimental Procedures

### Materials

Nickel (II) nitrate hexahydrate ( $\text{Ni}(\text{NO}_3)_2 \cdot 6\text{H}_2\text{O}$ ,  $\geq 98.0\%$ ), sodium borohydride ( $\text{NaBH}_4$ ,  $\geq 99\%$ ), 1,3,5-tricarboxylic acid ( $\text{H}_3\text{BTC}$ , 95%), N,N-dimethylformamide (DMF,  $\geq 99.8\%$ ), Ethanol and Methanol. All chemicals were purchased from Sigma Aldrich. All the chemicals were used as obtained without further purification. The water used was deionized water.

### Synthesis of nickel-oxide nanosheets ( $\text{NiO-NS}$ )

For synthesis of  $\text{NiO NS}$ , two different solutions were prepared: Solution A consisted of 0.582 g of  $\text{Ni}(\text{NO}_3)_2 \cdot 6\text{H}_2\text{O}$  in 50.0 mL of water, while Solution B contained of 0.2 g of  $\text{NaBH}_4$  dissolved in 20 mL of water. Solution A was stirred continuously for 10 minutes to ensure complete dissolution of the chemicals, then Solution B was added drop by drop to

Solution A. After allowing the reaction to proceed for 5 minutes, the resulting product was subjected to centrifugation and washed with ethanol three times. Finally, it was dried under vacuum at room temperature for two days.

#### Synthesis of Ni-*btc* nanosheets

A mixture of NiO-NS (58.8 mg) and H<sub>3</sub>btc (24.1 mg) was immersed in 10.0 ml of EtOH/DMF/H<sub>2</sub>O (1:1:1) solution with continuous stirring for 10 mins. After that, mixed solution was encapsulated in 25mL Teflon-line stainless steel autoclave and was left in oven at 100 °C for 24 hrs. The product was obtained by centrifugation, washed twice by DMF, immersed in methanol overnight and finally dried under vacuum at 40 °C.

**Model wastewater preparation:** An aqueous solution was prepared using 1 L of distilled water, 80 mg of CaCl<sub>2</sub>, 30 mg of Mg(NO<sub>3</sub>)<sub>2</sub>, 20 mg of K<sub>2</sub>SO<sub>4</sub>, 60 mg of Na<sub>2</sub>SO<sub>4</sub> and used for preparation of the suspension.

**Section S2: Characterization of Ni-*btc* NS MOF**

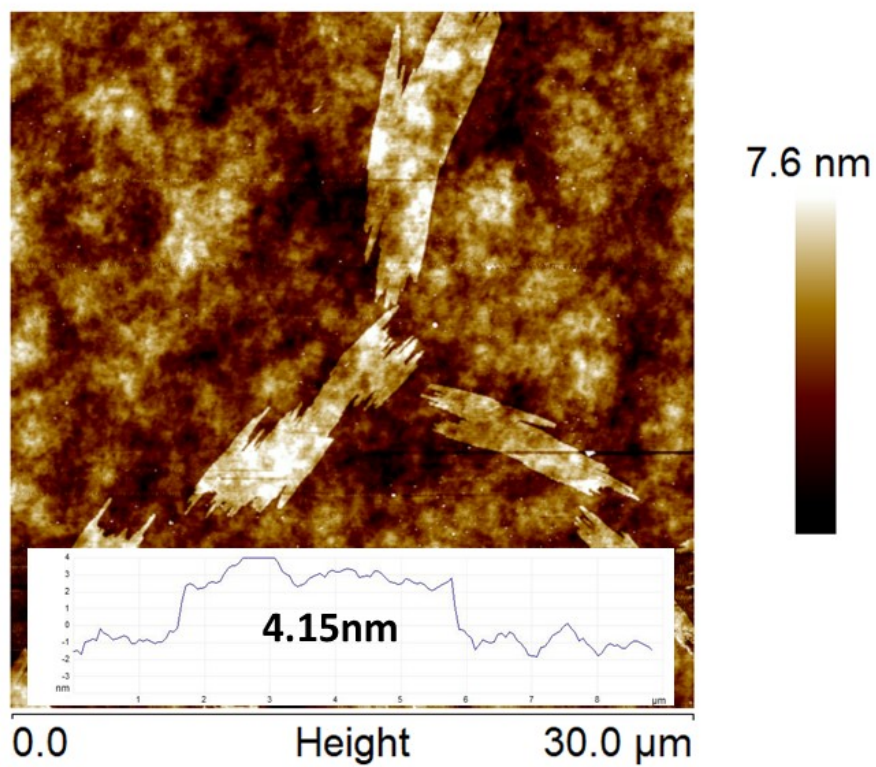

**Figure S1.** AFM image of Ni-*btc* ultrathin nanosheets with thickness of 4.15 nm

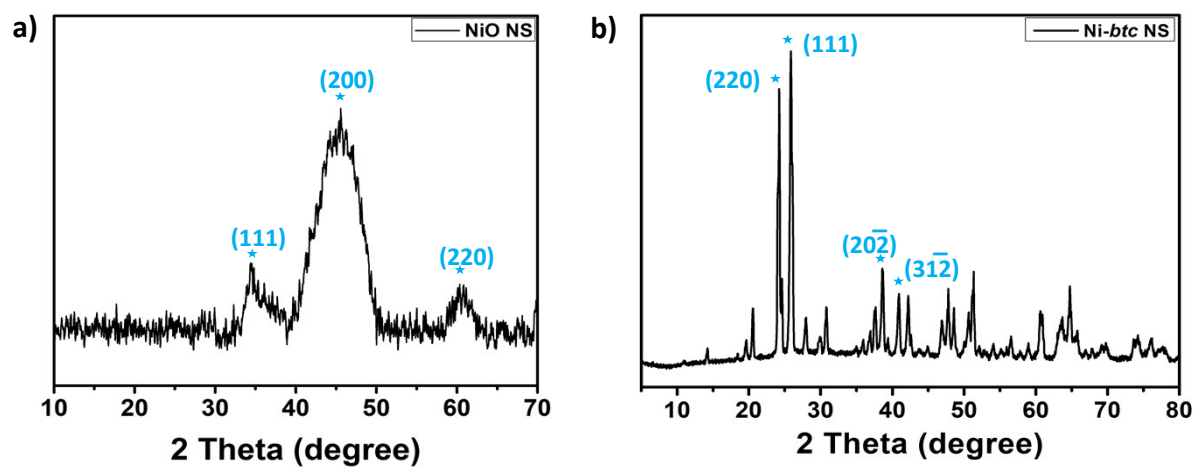

Figure S2. XRD profiles of a) NiO NS (JCPDS card no. #47-1049) b) Ni-btc NS

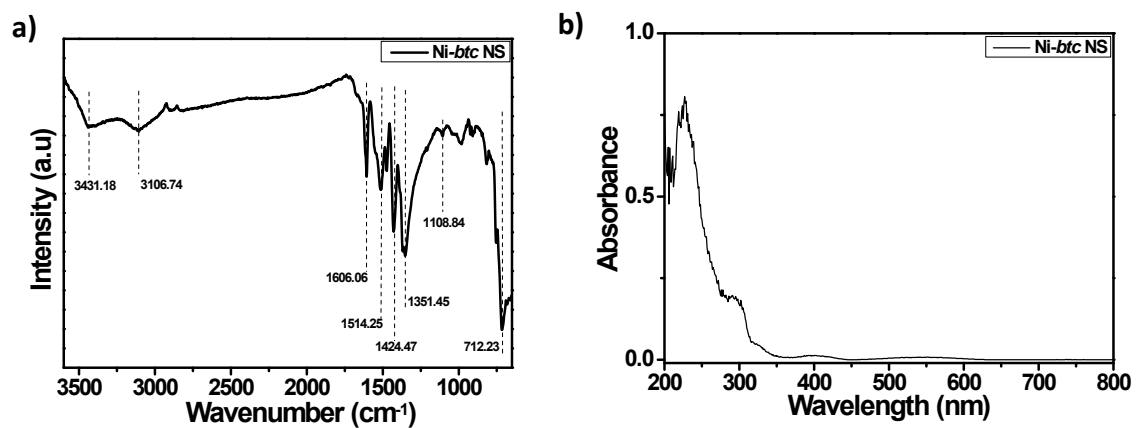

**Figure S3.** a) FT-IR and b) Solid-state UV-*Vis* spectrum of Ni-*btc* NS

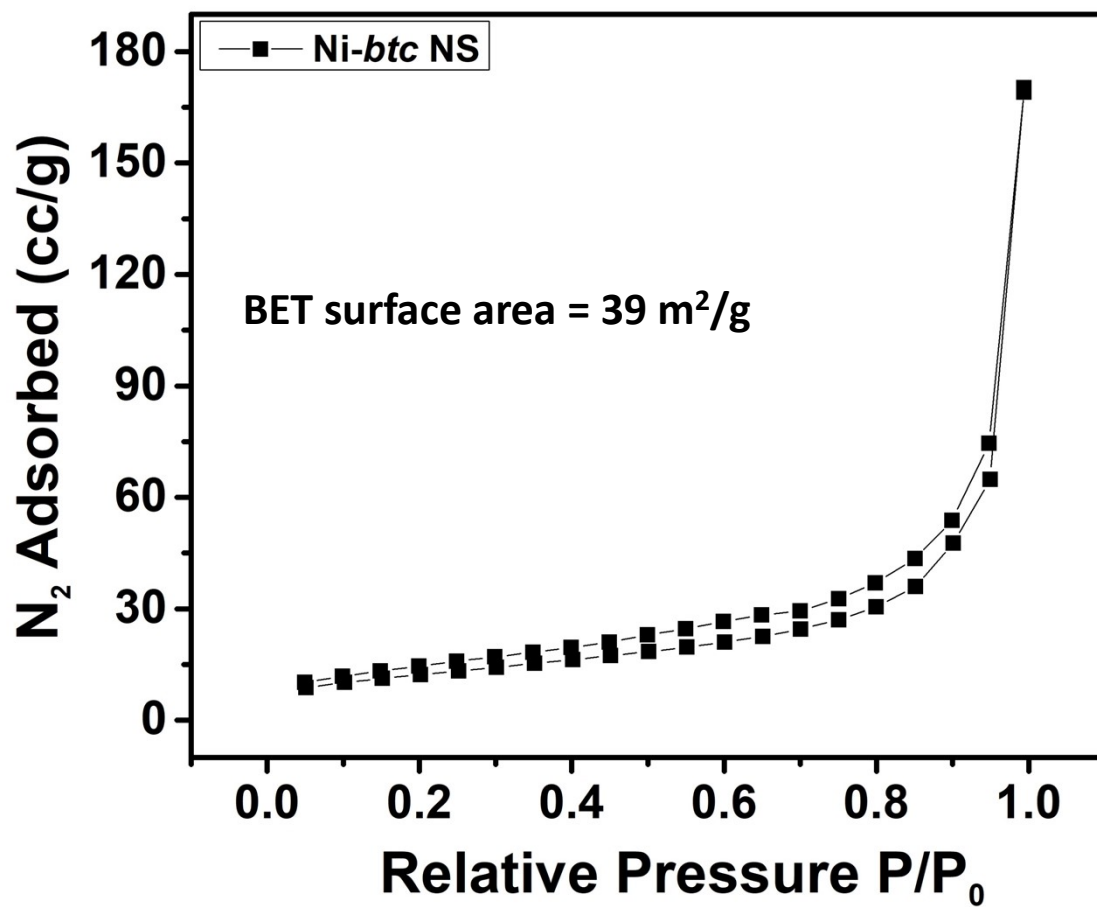

Figure S4. N<sub>2</sub> adsorption Isotherm of Ni-btc NS



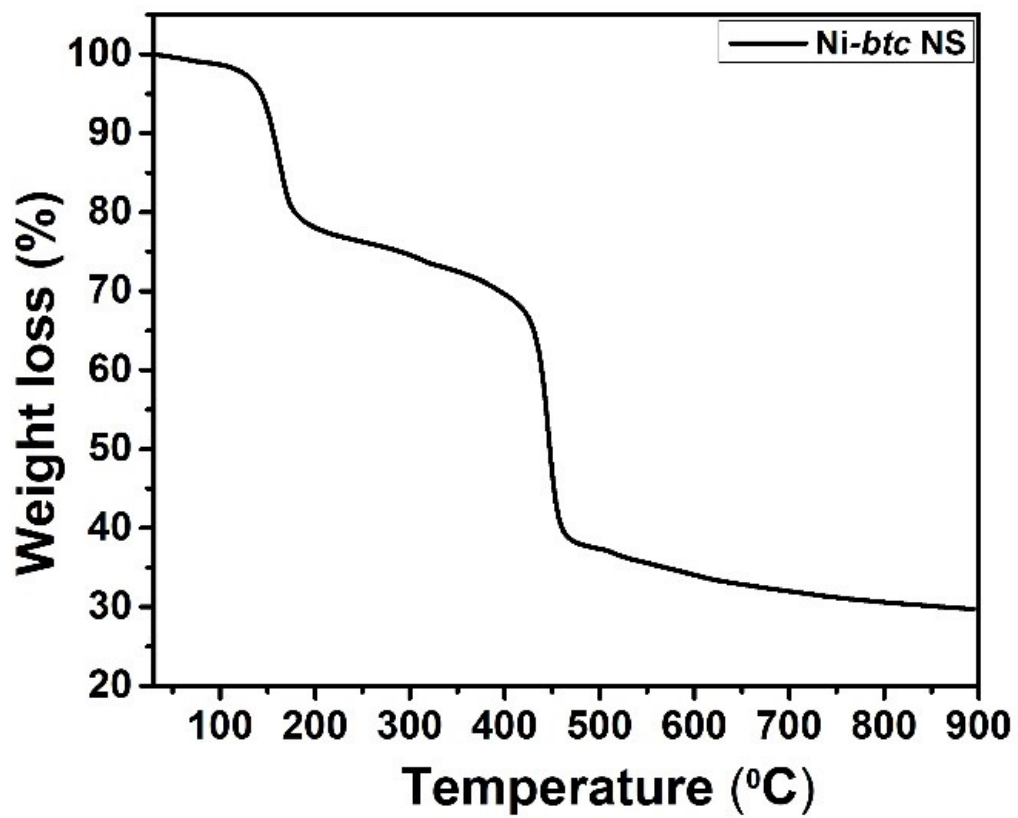

Figure S5. TGA spectra Ni-*btc* NS

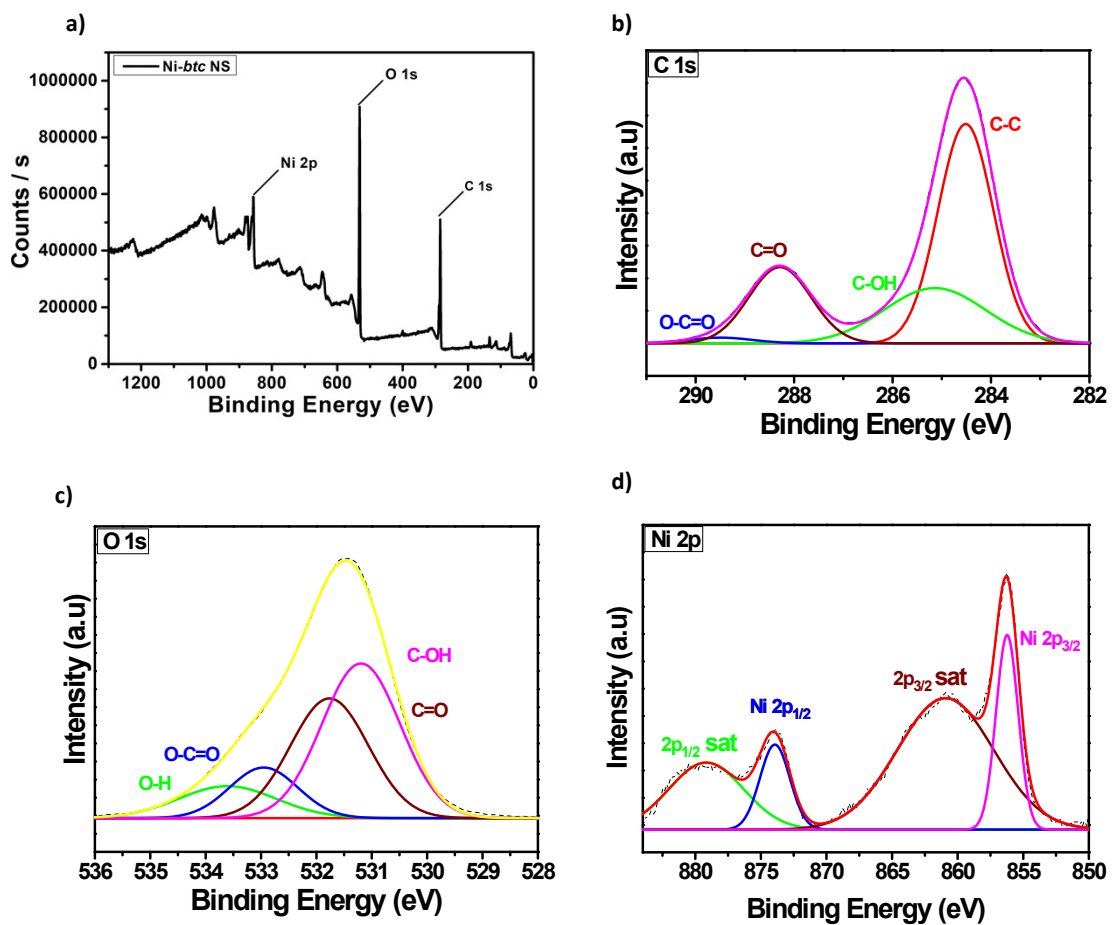

**Figure S6.** a) XPS Survey spectra, and b) Curve-resolved XPS of C1s, c) O1s and d) Ni 2p of Ni-*btc* NS

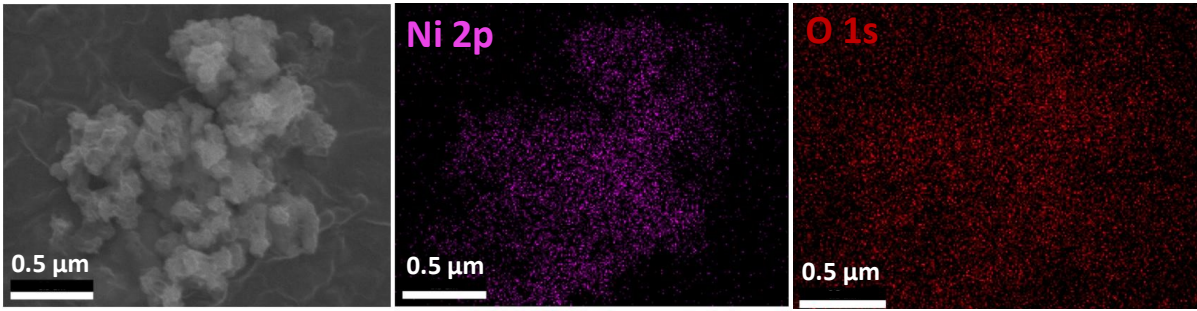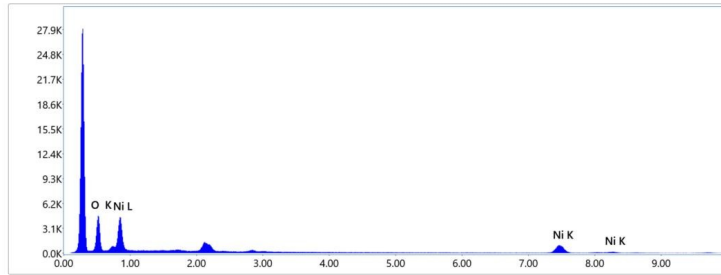

**Figure S7.** EDS mapping image of NiO NS

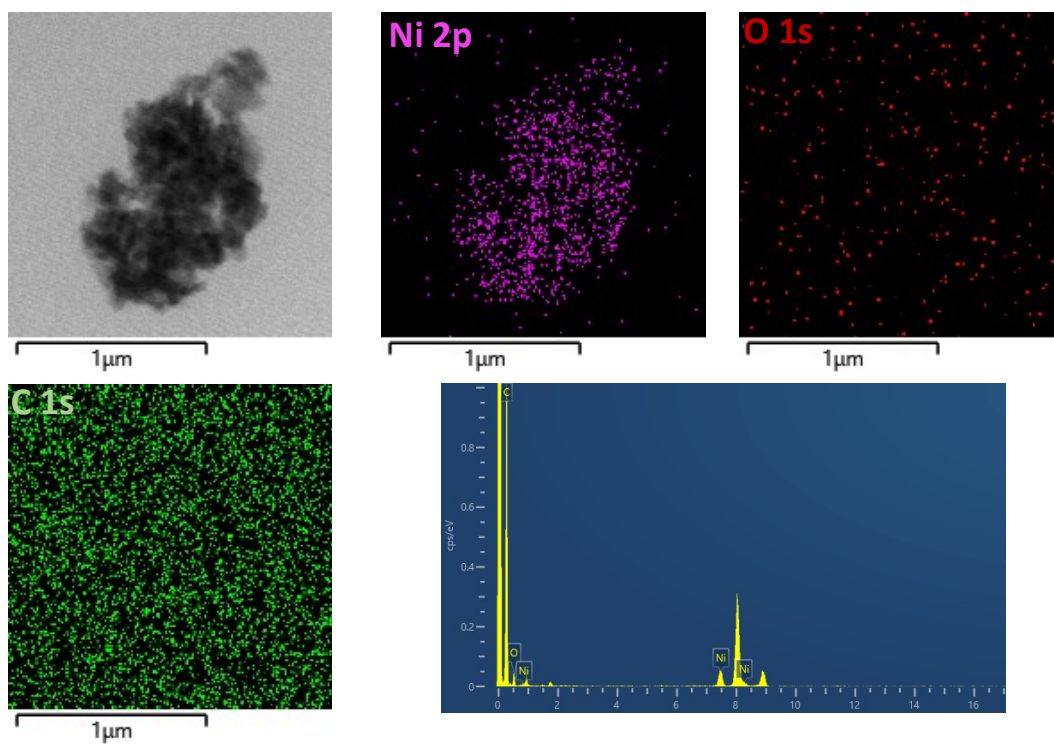

**Figure S8.** EDS mapping image of Ni-*btc* NS

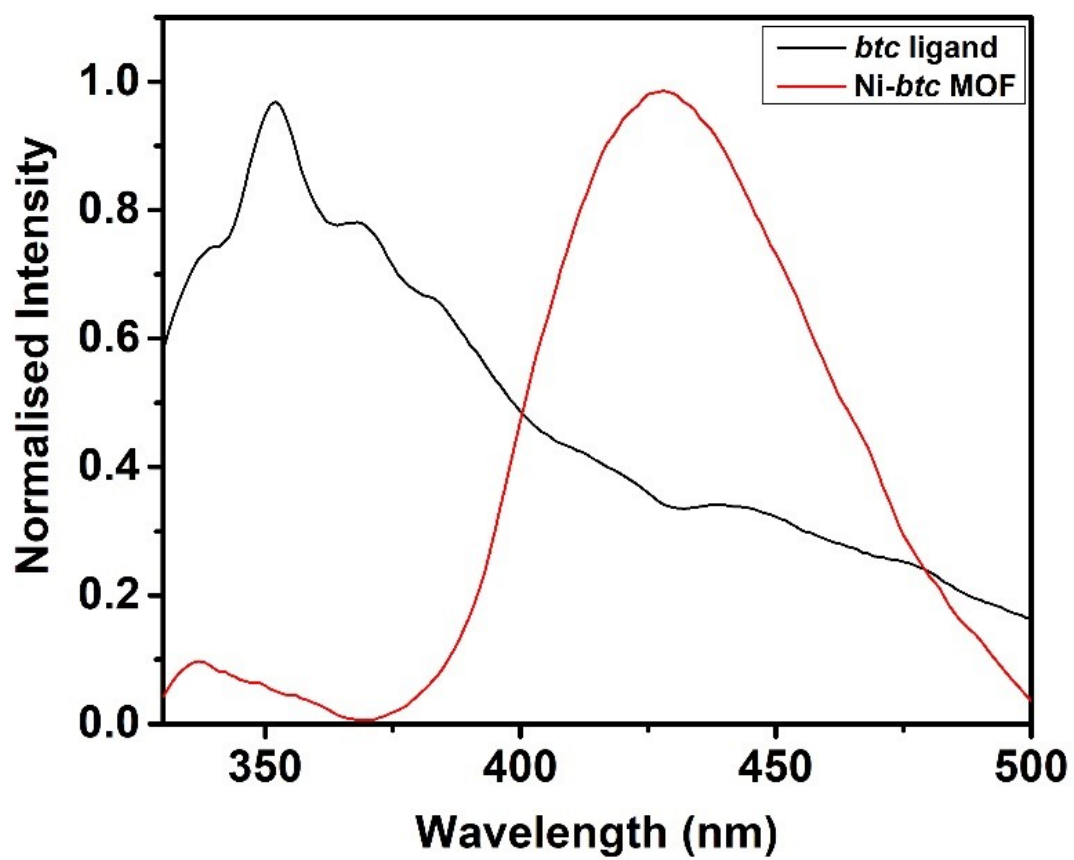

Figure S9. Emission spectra of Ni-*btc* and *btc* ligand.

### Section S3: Titration curves, Detection limit calculation and lifetime measurements

Detection limit was calculated using the following equation:

$$\text{Detection limit} = 3\sigma/m$$

Where ‘ $\sigma$ ’ is the calculated standard deviation from five blank measurements and ‘ $m$ ’ is the slope obtained from the plot of fluorescence emission with increasing concentration of analytes.

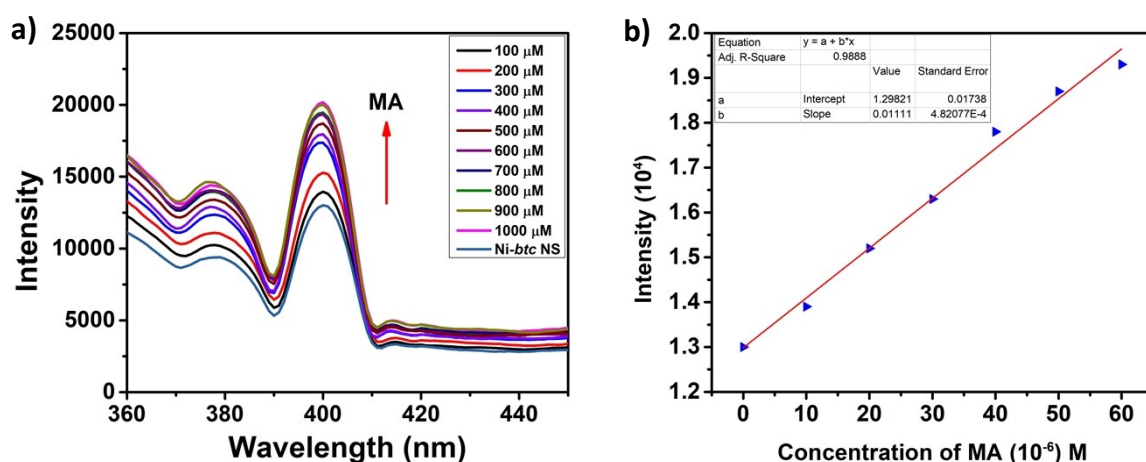

**Figure S10.** a) Change in emission spectrum of Ni-btc NS dispersed in water upon addition of Methyl Amine (MA) b) Determination of detection limit through fitting of the linear region of fluorescence intensity of Ni-btc NS upon adding different concentration of MA to it at  $\lambda_{\text{emi}} = 400$  nm (upon  $\lambda_{\text{exc}} = 310$  nm).

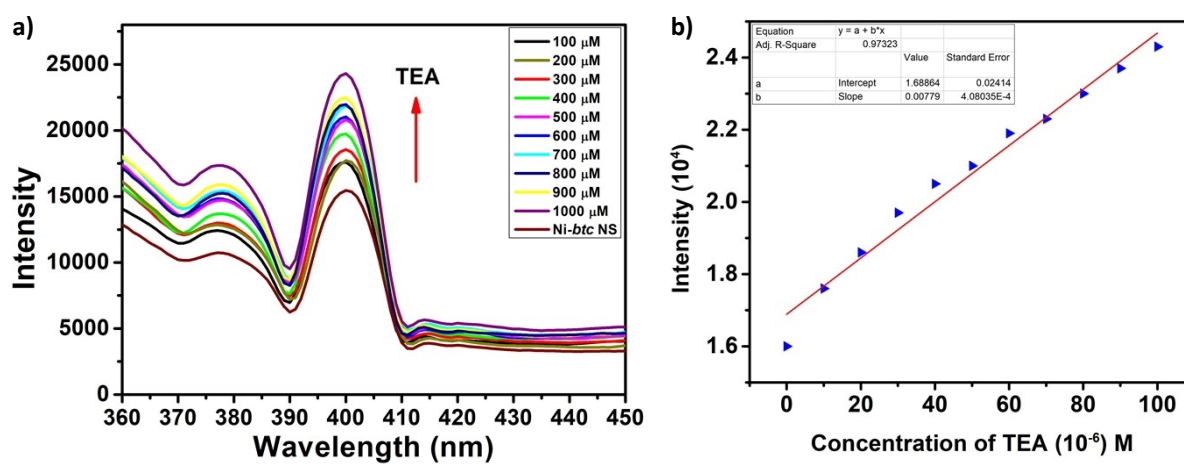

**Figure S11.** a) Change in emission spectrum of Ni-*btc* NS dispersed in water upon addition of Triethyl Amine (TEA) b) Determination of detection limit through fitting of the linear region of fluorescence intensity of Ni-*btc* NS upon adding different concentration of TEA to it at  $\lambda_{\text{emi}} = 400 \text{ nm}$  (upon  $\lambda_{\text{exc}} = 310 \text{ nm}$ ).

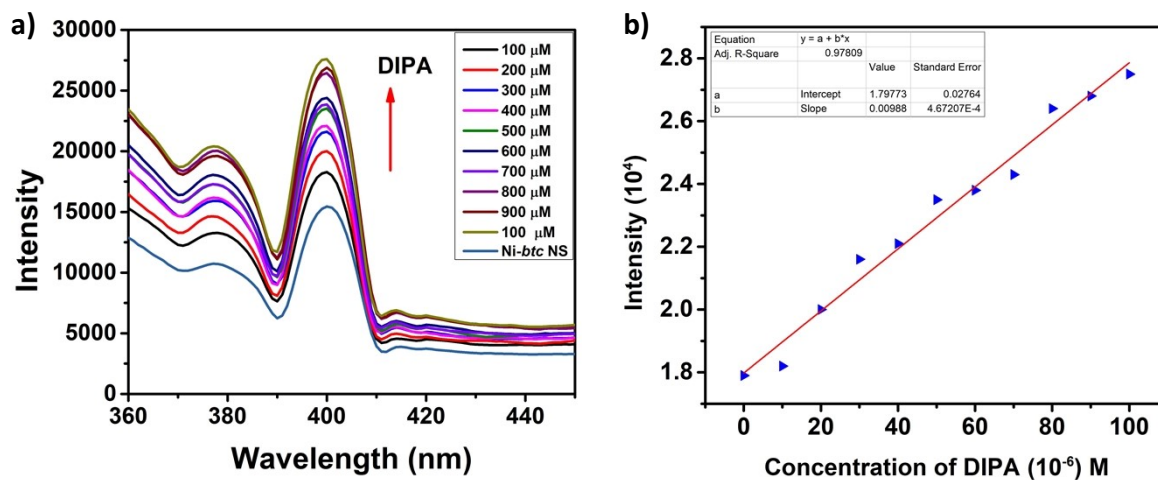

**Figure S12.** a) Change in emission spectrum of Ni-*btc* NS dispersed in water upon addition of Diisopropyl Amine (DIPA) b) Determination of detection limit through fitting of the linear region of fluorescence intensity of Ni-*btc* NS upon adding different concentration of DIPA to it at  $\lambda_{\text{emi}} = 400$  nm (upon  $\lambda_{\text{exc}} = 310$  nm).



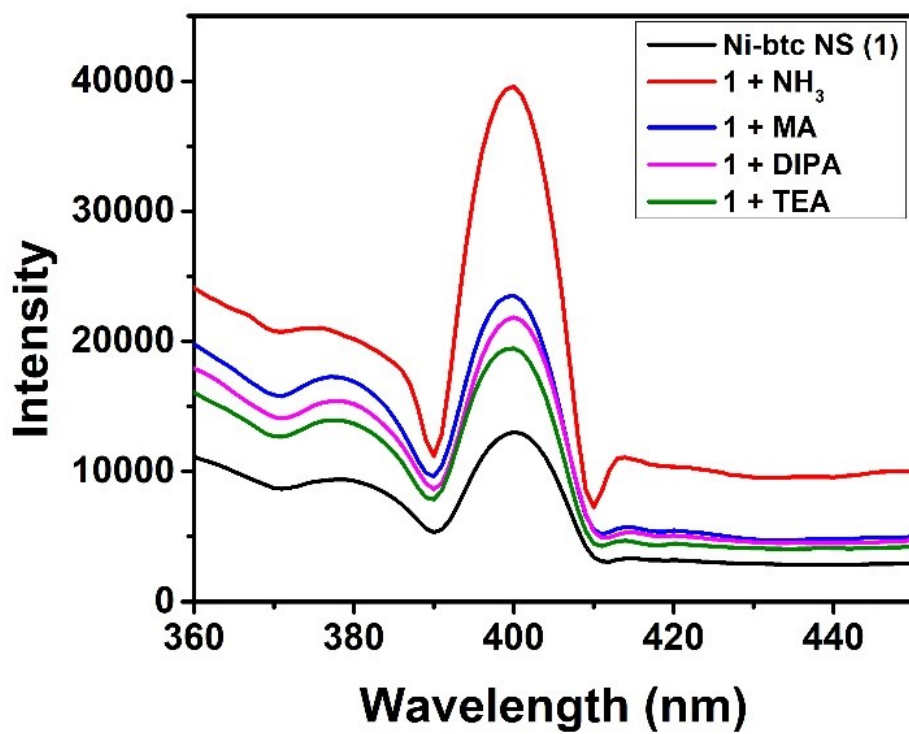

**Figure S13.** Comparison of fluorescence enhancement of Ni-*btc* NS (1) with different amines (0.5 mM)

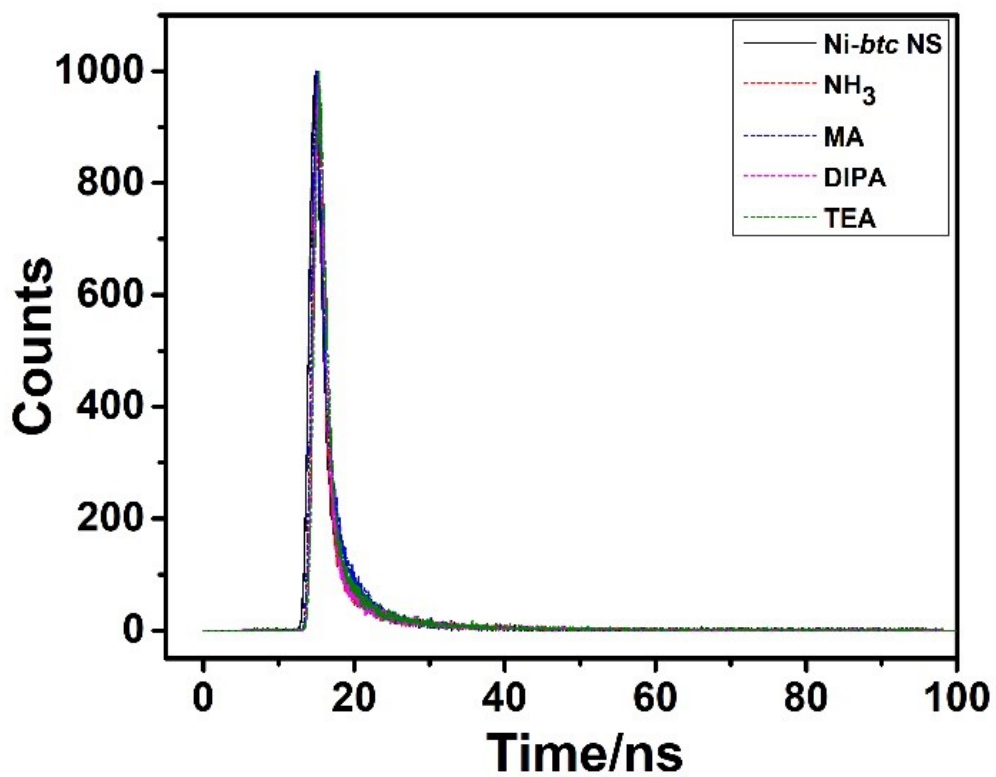

**Figure S14.** Lifetime decay profiles of Ni-*btc* NS before and after immersing in NH<sub>3</sub>, MA, DIPA and TEA

**Table S1.** Average lifetime of Ni-*btc* NS before and after addition of amines

|                             | Ni- <i>btc</i> NS (1) | 1+ NH <sub>3</sub> | 1+ MA | 1+ DIPA | 1+ TEA |
|-----------------------------|-----------------------|--------------------|-------|---------|--------|
| $\tau_1$ (ns)               | 1.01                  | 0.72               | 0.72  | 0.81    | 0.91   |
| $\alpha_1$                  | 0.76                  | 0.75               | 0.73  | 0.77    | 0.74   |
| $\tau_2$ (ns)               | 6.53                  | 5.98               | 5.96  | 6.99    | 6.49   |
| $\alpha_2$                  | 0.24                  | 0.25               | 0.27  | 0.23    | 0.26   |
| $\langle \tau \rangle$ (ns) | 4.77                  | 4.57               | 4.67  | 5.25    | 4.89   |

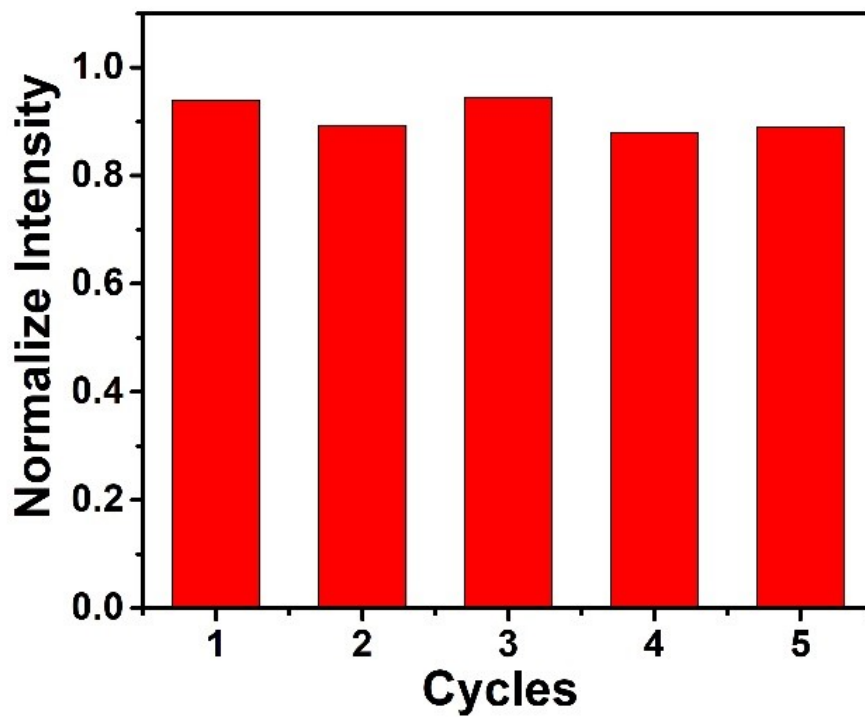

**Figure S15.** Five consecutive detection-regeneration cycles of Ni-*btc* NS for NH<sub>3</sub> sensing

## Section S4: HOMO LUMO energy calculations

### Electrochemical measurements

To obtain HOMO and LUMO values for the MOF, cyclic voltammetry plots were collected for **Ni-*btc* NS MOF**. CV was recorded with the help of three electrode cell setup using Fluorine-doped Tin Oxide (FTO) as the working electrode, platinum as the counter electrode, and Ag/AgCl as a reference electrode. 0.1M tetrabutylammonium hexafluorophosphate in acetonitrile was used as an electrolyte with a scan rate of 100 mV/s. The onset oxidation potential and reduction potential values obtained from CV measurements were used to calculate the HOMO and LUMO energy levels with the help of the following equation:

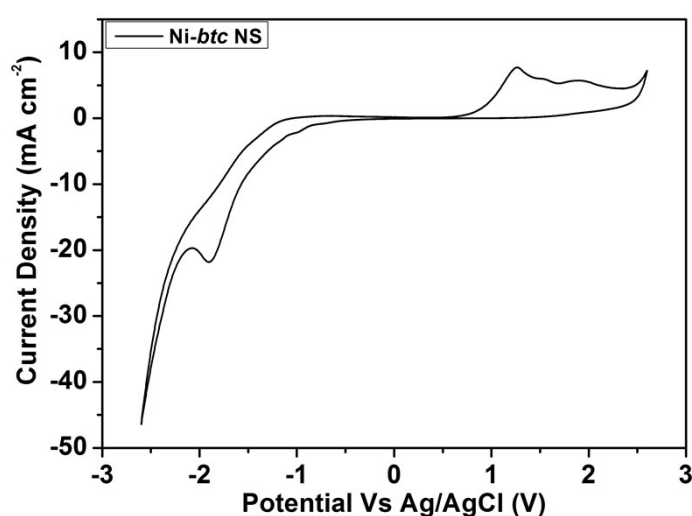

**Figure S16.** Cyclic Voltammetry plot of **Ni-*btc* NS** obtained in acetonitrile medium with scan rate of 100 mV/s.

$$E_{\text{HOMO}} = -e [E_{\text{ox onset}} + 4.741] \text{ eV} \text{ and } E_{\text{LUMO}} = -e [E_{\text{red onset}} + 4.741] \text{ eV}.$$

Similarly, the band gap was calculated using the following formula:  $E_g = E_{\text{LUMO}} - E_{\text{HOMO}}$ , and the band gap resulted as 2.19 eV for both the frameworks.

## Computational Methods

HOMO and LUMO energies and Dipole moment calculated for amines using Gaussian 09 package and their subsequent geometry optimization was carried out at B3LYP level of DFT.<sup>1</sup>

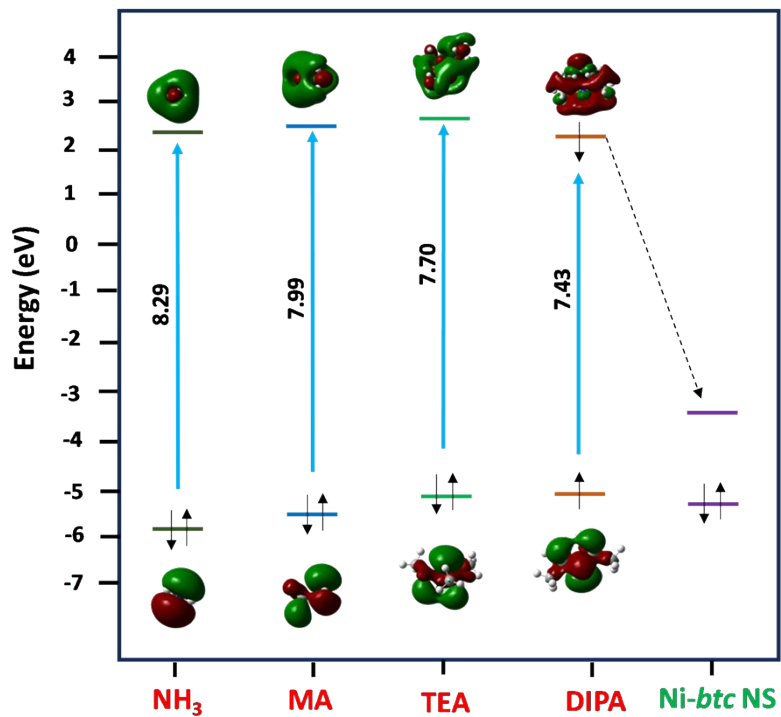

Figure S17. HOMO and LUMO energy levels of amines analytes.

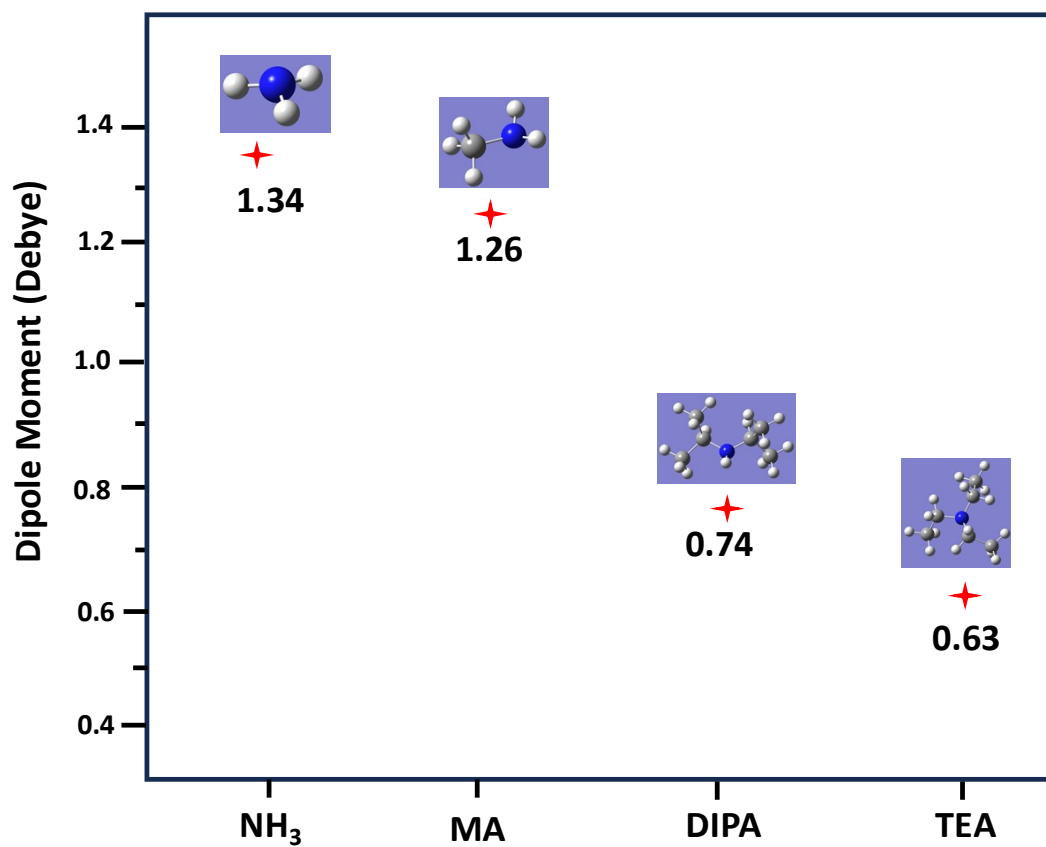

Figure S18. Dipole moment of amines analytes.

**Table S2.** HOMO and LUMO energies calculated for amines

|                 | $E_{\text{HOMO}}$ (eV) | $E_{\text{LUMO}}$ (eV) |
|-----------------|------------------------|------------------------|
| NH <sub>3</sub> | -5.98                  | 2.32                   |
| MA              | -5.60                  | 2.39                   |
| TEA             | -5.24                  | 2.45                   |
| DIPA            | -5.22                  | 2.21                   |



**Table S3.** Comparative list of various fluorescent CPs / MOFs including **Ni-*btc* NS** that have been used for sensing of ammonia in water solvent.

| Serial No. | Metal Organic Framework                                                                                       | Analyte | Luminescence type | LOD         | Reference        |
|------------|---------------------------------------------------------------------------------------------------------------|---------|-------------------|-------------|------------------|
| 1          | <b>Ni-<i>btc</i> NS</b>                                                                                       | Ammonia | Turn ON           | 0.00075 ppm | <b>This work</b> |
| 2          | UiO-68(bod)                                                                                                   | Ammonia | Turn ON           | 0.0065 ppm  | 2                |
| 3          | SNNU-88                                                                                                       | Ammonia | Turn OFF          | ~1.5 ppm    | 3                |
| 4          | {Cd <sub>4</sub> (HIDCPy) <sub>6</sub> }.4DMF.4C <sub>2</sub> H <sub>8</sub> N.H <sub>2</sub> O} <sub>n</sub> | Ammonia | Turn ON           | NA          | 4                |

**Abbreviation:** **H<sub>3</sub>btc** = benzene tricarboxylic acid; **bod** = 2,1,3-benzoxadiazole; **SNNU-88** = magnesium–organic framework; **H<sub>2</sub>IDCPy** = 2-(pyridine-2-yl)-1H-imidazole-4,5-dicarboxylic acid

**Table S4.** Comparative list of various fluorescent CPs / MOFs including Ni-*btc* NS that have been used for sensing of various amines in water solvent.

| Serial No. | Metal Organic Framework                                                                                                                                                                                | Analyte           | Luminescence type | LOD                                                               | Reference |
|------------|--------------------------------------------------------------------------------------------------------------------------------------------------------------------------------------------------------|-------------------|-------------------|-------------------------------------------------------------------|-----------|
| 1          | Ni- <i>btc</i> NS                                                                                                                                                                                      | MA<br>DIPA<br>TEA | Turn ON           | 0.297 $\mu\text{M}$<br>0.330 $\mu\text{M}$<br>0.424 $\mu\text{M}$ | This work |
| 2          | [{Zn(L)(oba)}.4H <sub>2</sub> O] <sub>a</sub><br>[Cd <sub>1/2</sub> L <sub>1/2</sub> (nipa) <sub>1/2</sub> (H <sub>2</sub> O) <sub>1/2</sub> ]<br>(DMF) <sub>1/2</sub> (H <sub>2</sub> O) <sub>a</sub> | DIPA              | Turn OFF          | 6.76 $\mu\text{M}$<br>2.39 $\mu\text{M}$                          | 5         |
| 3          | Zr-BTDB                                                                                                                                                                                                | MA                | Turn ON           | 0.066 $\mu\text{M}$                                               | 6         |
| 4          | [Ln <sub>2</sub> (L <sup>2</sup> ) <sub>2</sub> (DMF) <sub>2</sub> (H <sub>2</sub> O) <sub>4</sub> ]. H <sub>2</sub> O.DMF<br>(Ln = Pr; Sm; Eu; Gd; Dy; Ho)                                            | DIPA<br>TEA       | Turn OFF          | 16.4 $\mu\text{M}$<br>15.7 $\mu\text{M}$                          | 7         |
| 5          | Al MOF                                                                                                                                                                                                 | TEA               | NA                | 3 $\mu\text{M}$                                                   | 8         |

**Abbreviation:** H<sub>3</sub>*btc* = benzene tricarboxylic acid; L = N<sup>2</sup>,N<sup>6</sup>-di(pyridin-4-yl)naphthalene-2,6-dicarboxamide; 4, 4'-H<sub>2</sub>oba = 4, 4'-oxybisbenzoic acid; 5-H<sub>2</sub>nipa = 5-nitroisophthalic acid; BTDB = 4,4'-(benzo[c][1,2,5]thiadiazole-4,7-diyl) dibenzoic acid; ; H<sub>3</sub>L<sup>2</sup> = 5-(2-nitro-4-carboxylphenyl)isophthalic acid; Al-MOF = Aluminium Metal Organic Framework

#### Section S4: Mixed Matrix Membrane (MMM) studies

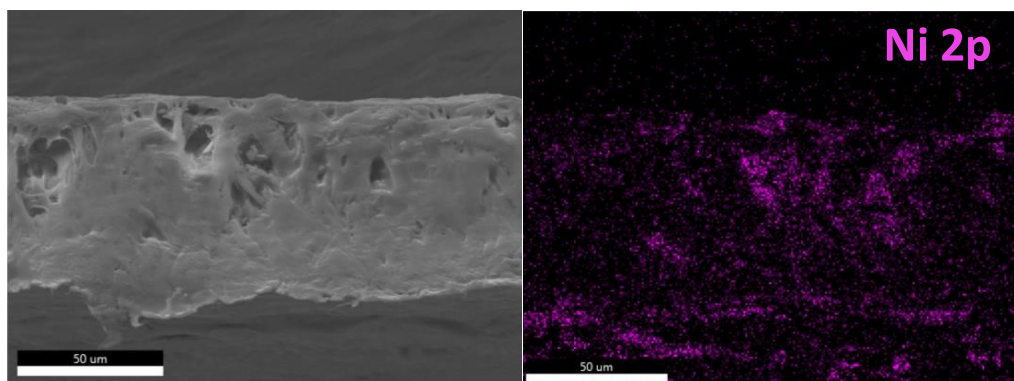

**Figure S19.** The EDS mapping image of Ni-*btc* NS MMM cross section area.

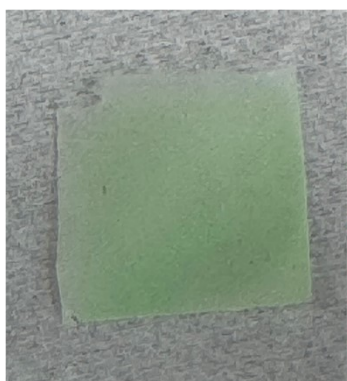

**before**

in presence of  
→  
H<sub>2</sub>O vapors

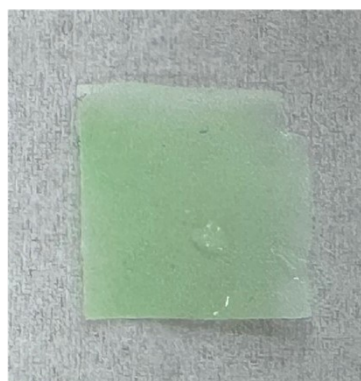

**after**

**Fig**

re S20. Ni-*btc* NS MMM upon exposure to water vapors.

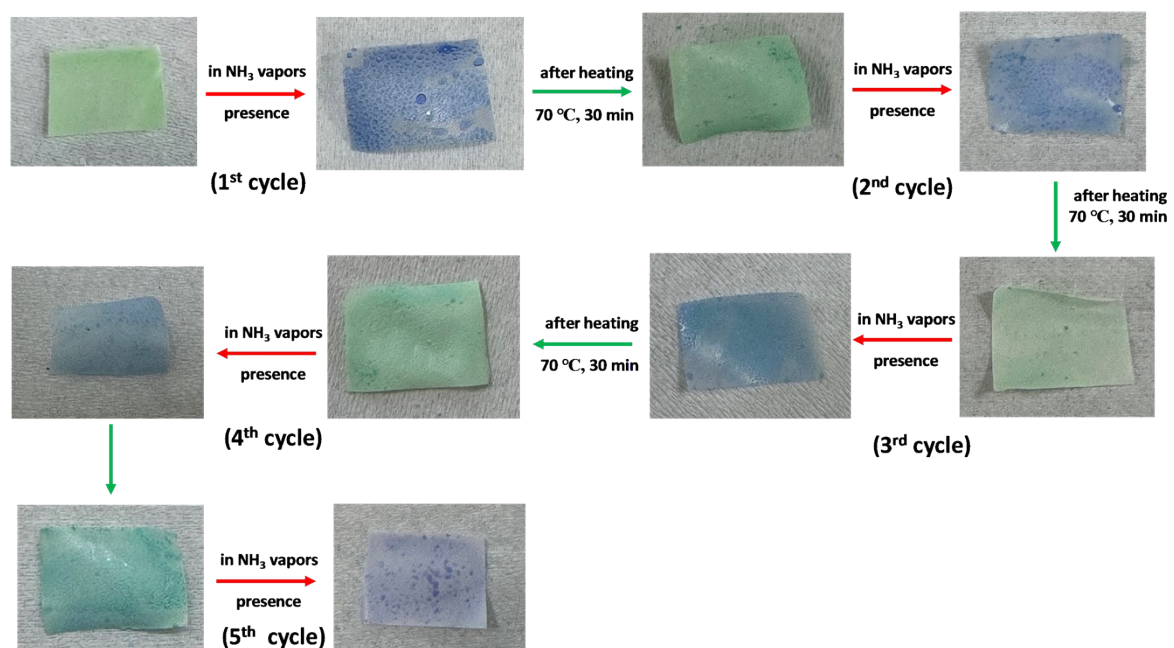

**Figure S21.** Visible color change of Ni-*btc* NS MMM upon exposure to NH<sub>3</sub> vapors for five consecutive cycles.

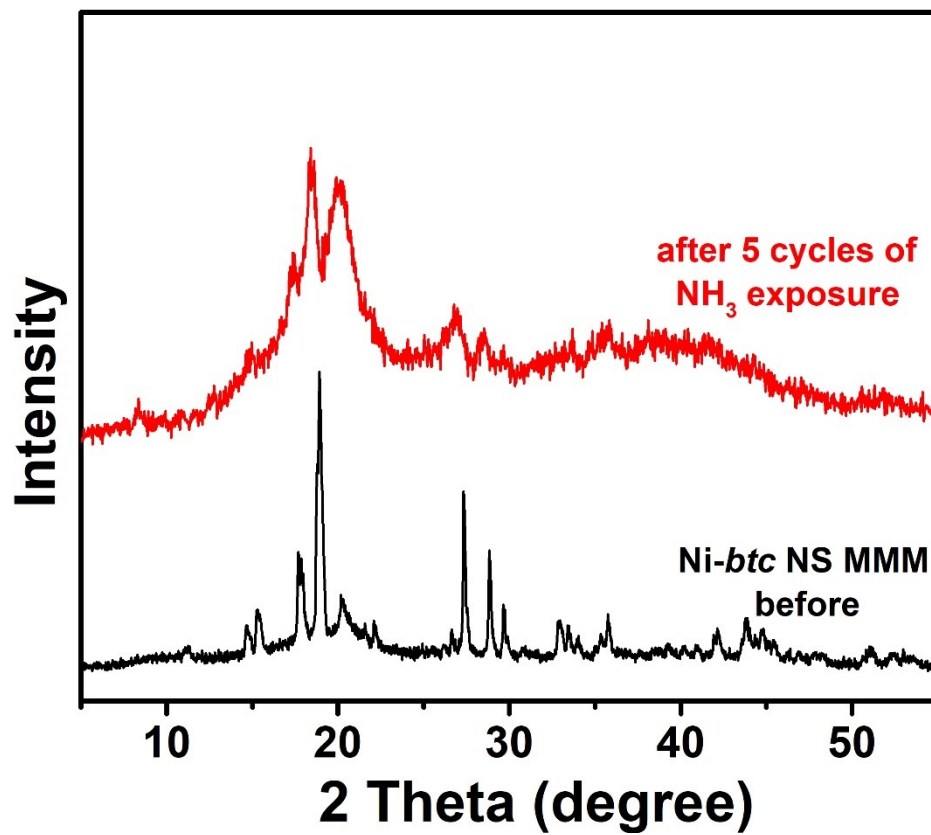

**Figure S22.** PXRD of Ni-*btc* NS MMM after exposure to NH<sub>3</sub> vapors for five consecutive cycles.

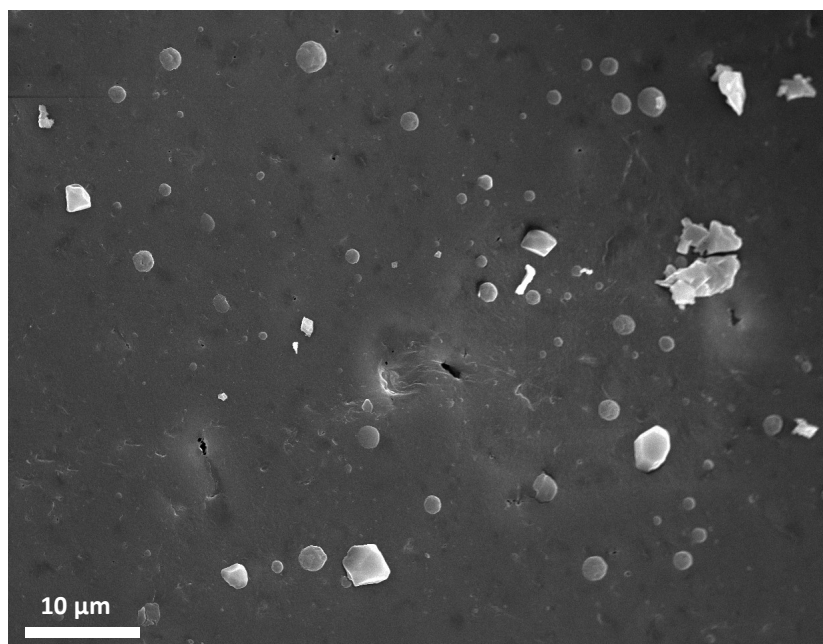

**Figure S23.** FESEM of Ni-btc NS MMM after exposure to  $\text{NH}_3$  vapors for five consecutive cycles.

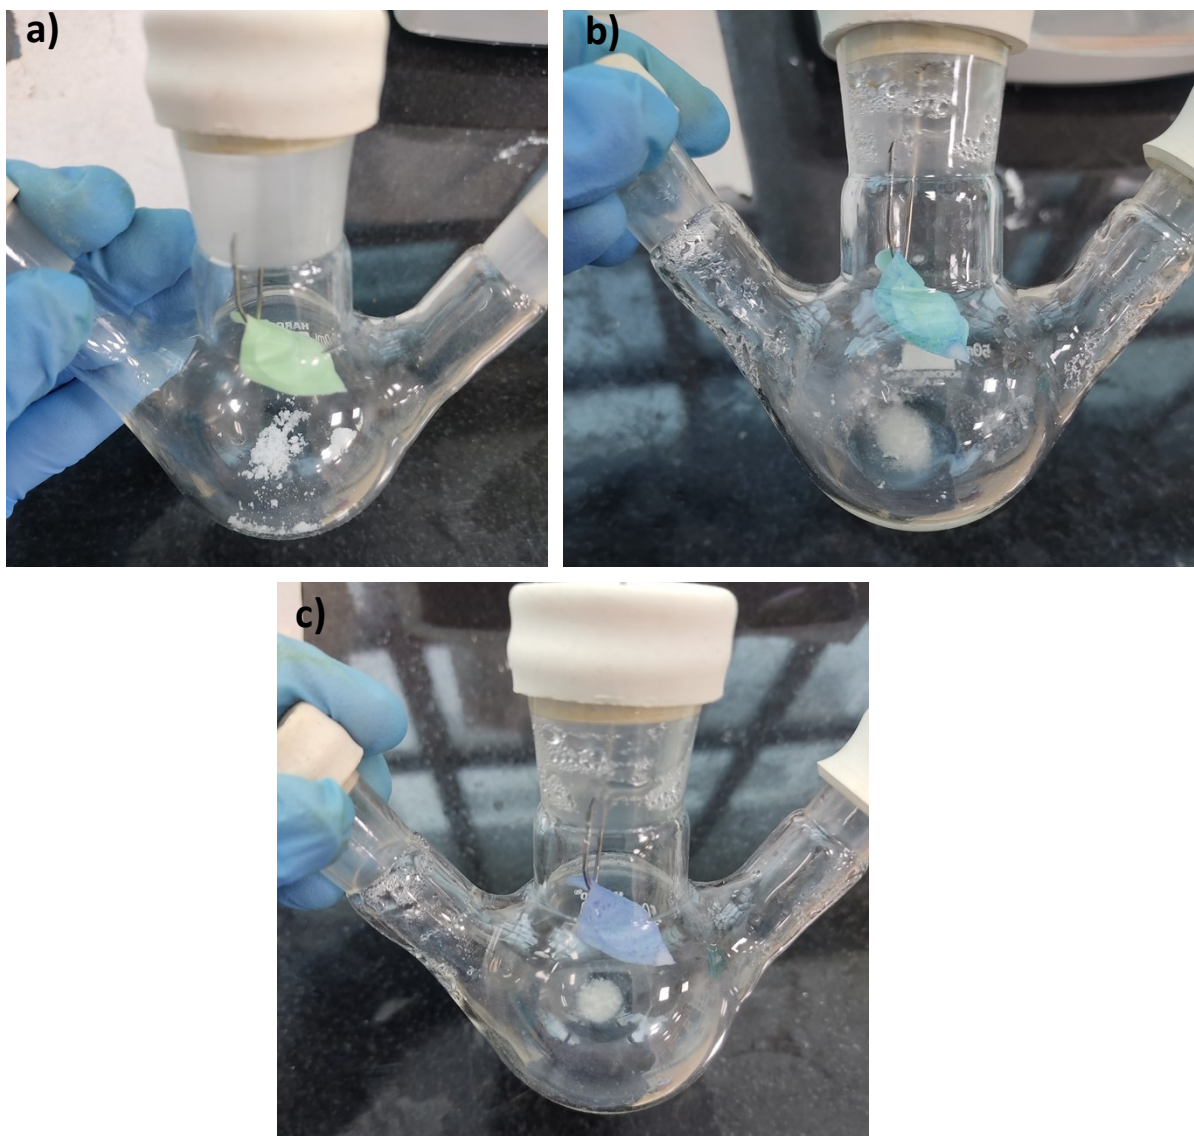

**Figure S24.** Experimental setup for ammonia sensing from chemical reaction with Ni-*btc* NS MMM a) before b) in between and c) after reaction completion



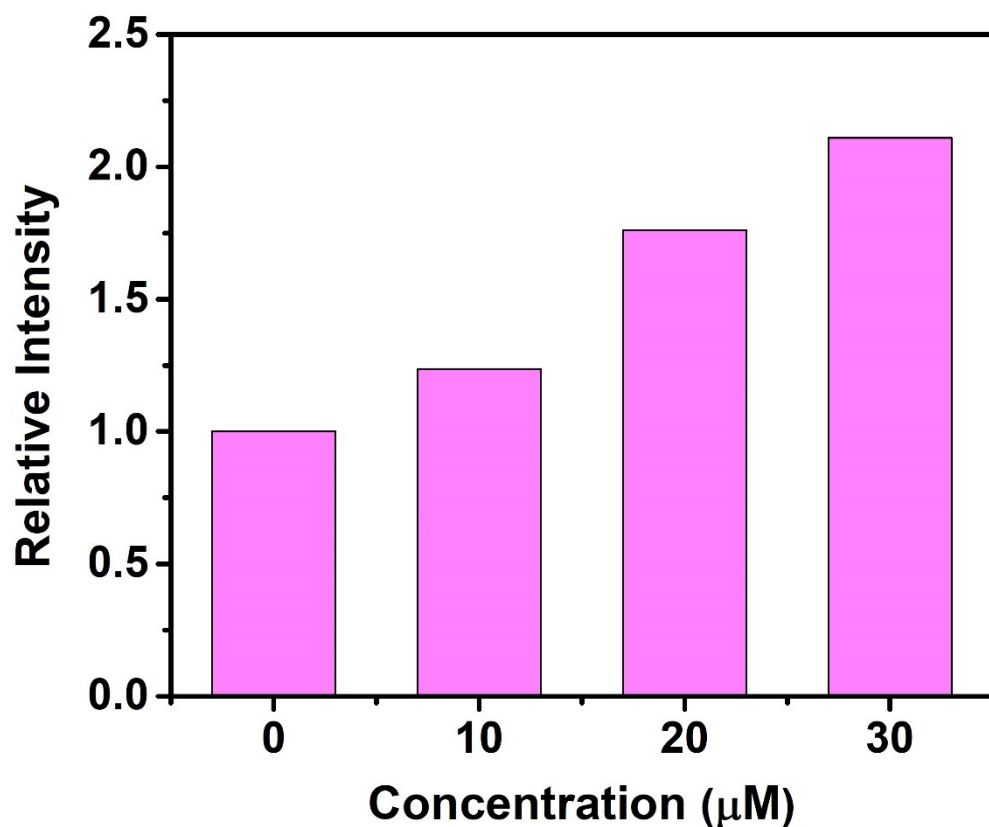

**Figure S25.** Results of the fluorescence sensing experiment with model contaminated wastewater.

**Table S5:** Model contaminated wastewater study

| Spiked $\text{NH}_3$ (aq.) concentration ( $\mu\text{M}$ ) | Found ( $\mu\text{M}$ ) | RC (%) |
|------------------------------------------------------------|-------------------------|--------|
| 10                                                         | 9.386                   | 93.86  |
| 20                                                         | 19.711                  | 98.55  |
| 30                                                         | 28.758                  | 95.86  |

➤ RC %, Recovery percent

## References:

1. Frisch, M. J.; Trucks, G. W.; Schlegel, H. B.; Scuseria, G. E.; Robb, M. A.; Cheeseman, J. R.; Scalmani, G.; Barone, V.; Mennucci, B.; Petersson, G. A.; Nakatsuji, H.; Caricato, M.; Li, X.; Hratchian, H. P.; Izmaylov, A. F.; Bloino, J.; Zheng, G.; Sonnenberg, J. L.; Hada, M.; Ehara, M.; Toyota, K.; Fukuda, R.; Hasegawa, J.; Ishida, M.; Nakajima, T.; Honda, Y.; Kitao, O.; Nakai, H.; Vreven, T.; Montgomery, J. A.; Peralta, J. E.; Ogliaro, F.; Bearpark, M.; Heyd, J. J.; Brothers, E.; Kudin, K. N.; Staroverov, V. N.; Kobayashi, R.; Normand, J.; Raghavachari, K.; Rendell, A.; Burant, J. C.; Iyengar, S. S.; Tomasi, J.; Cossi, M.; Rega, N.; Millam, J. M.; Klene, M.; Knox, J. E.; Cross, J. B.; Bakken, V.; Adamo, C.; Jaramillo, J.; Gomperts, R.; Stratmann, R. E.; Yazyev, O.; Austin, A. J.; Cammi, R.; Pomelli, C.; Ochterski, J. W.; Martin, R. L.; Morokuma, K.; Zakrzewski, V. G.; Voth, G. A.; Salvador, P.; Dannenberg, J. J.; Dapprich, S.; Daniels, A. D.; Farkas; Foresman, J. B.; Ortiz, J. V.; Cioslowski, J.; Fox, D. J. Gaussian 09, Revision B.01; Gaussian, Inc., Wallingford, CT, 2009.
2. D. I. Pavlov, T. S. Sukhikh, A. A. Ryadun, V. V. Matveevskaya, K. A. Kovalenko, E. Benassi, V. P. Fedin and A. S. Potapov, *J. Mater. Chem. C*, 2022, **10**, 5567–5575.
3. Y. P. Li, S. N. Li, Y. C. Jiang, M. C. Hu and Q. G. Zhai, *Chem. Commun.*, 2018, **54**, 9789–9792.
4. J. Ma, T. Zhou, T. Ma, Z. Yang, J. H. Yang, Q. Guo, W. Liu, Q. Yang, W. Liu and T. Yang, *Cryst. Growth Des.*, 2021, **21**, 383–395.
5. P. Rani, A. Husain, K. K. Bhasin and G. Kumar, *Inorg. Chem.*, 2022, **61**, 6977–6994.
6. A. Mallick, A. M. El-Zohry, O. Shekhah, J. Yin, J. Jia, H. Aggarwal, A. H. Emwas, O. F. Mohammed and M. Eddaoudi, *J. Am. Chem. Soc.*, 2019, **141**, 7245–7249.
7. H. Huang, W. Gao, X. M. Zhang, A.-M. Zhou and J. P. Liu, *CrystEngComm*, 2019, **21**, 694–702.
8. J. Ni, M.-Y. Li, Z. Liu, H. Zhao, J.-J. Zhang, S.-Q. Liu, J. Chen, C.-Y. Duan, L.-Y. Chen and X.-D. Song, *ACS Appl. Mater. Interfaces*, 2020, **12**, 12043–12053.
